# Supplementary material
Source: publisher figshare collection journal article supplement (https://frontiersin.figshare.com/ndownloader/files/15122825)
Supplement: Supplementary file [file 15122825]

**A.**

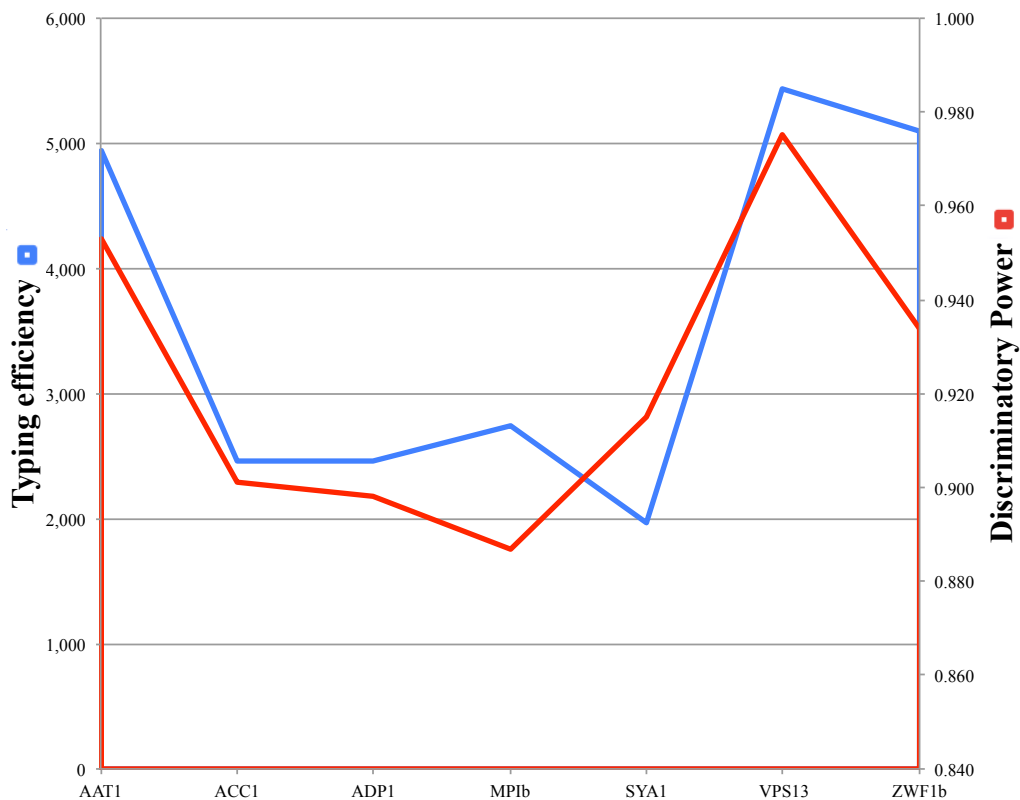

**B.**

| Number of loci<br>(number of combinations) | Minimum number of STs found | Mean number of STs found | Maximum number of STs found |
|--------------------------------------------|-----------------------------|--------------------------|-----------------------------|
| 1 (7)                                      | 113                         | 2,002,857                | 299                         |
| 2 (21)                                     | 532                         | 8,171,429                | 1145                        |
| 3 (35)                                     | 1000                        | 1506                     | 1858                        |
| 4 (35)                                     | 1000                        | 2,083,314                | 2394                        |
| 5 (21)                                     | 1000                        | 2,591,572                | 2849                        |
| 6 (7)                                      | 1000                        | 3,058,572                | 3191                        |
| 7 (1)                                      | 1000                        | 3482                     | 3482                        |

**C.**

| Number of loci | Maximum number of ST | Combinations analyzed | Housekeeping genes                          |
|----------------|----------------------|-----------------------|---------------------------------------------|
| 2              | 1145                 | 21                    | VPS13, ZWF1b                                |
| 3              | 1858                 | 35                    | AAT1a, VPS13, ZWF1b                         |
| 4              | 2394                 | 35                    | AAT1a, ACC1, VPS13, ZWF1b                   |
| 5              | 2849                 | 21                    | AAT1a, ACC1, SYA1, VPS13, ZWF1b             |
| 6              | 3191                 | 7                     | AAT1a, ACC1, ADP1, SYA1, VPS13, ZWF1b       |
| 7              | 3482                 | 1                     | AAT1a, ACC1, ADP1, MPIb, SYA1, VPS13, ZWF1b |
